# Supplementary material for: APTS and rGO co-functionalized pyrenated fluorescent nanonets for representative vapor phase nitroaromatic explosive detection
Source: Royal Society of Chemistry journal article supplement (doi:10.1039/c3nr04960d), 2013-11-11
Supplement: c3nr04960d.pdf [file c3nr04960d.pdf]

## Supporting Information

### APTS and RGO Co-Functionalized Pyrenated Fluorescent Nanonets for Representative Vapor Phase Nitroaromatic Explosives Detection

Linjuan Guo,<sup>a,b</sup> Baiyi Zu,<sup>b</sup> Zheng Yang,<sup>b,c</sup> Hongyu Cao<sup>a</sup>, Xuefang Zheng<sup>\*a</sup> and Xincun Dou<sup>\*b</sup>

TABLE S1 Vapor pressure of TNT and its analogues<sup>1</sup>

| Molecule          | Vapor pressure (ppb) 25°C |
|-------------------|---------------------------|
| TNT               | 10                        |
| DNT               | 180                       |
| PA                | $7.7 \times 10^{-3}$      |
| PNT               | 647                       |
| NaNO <sub>3</sub> | 0.255                     |

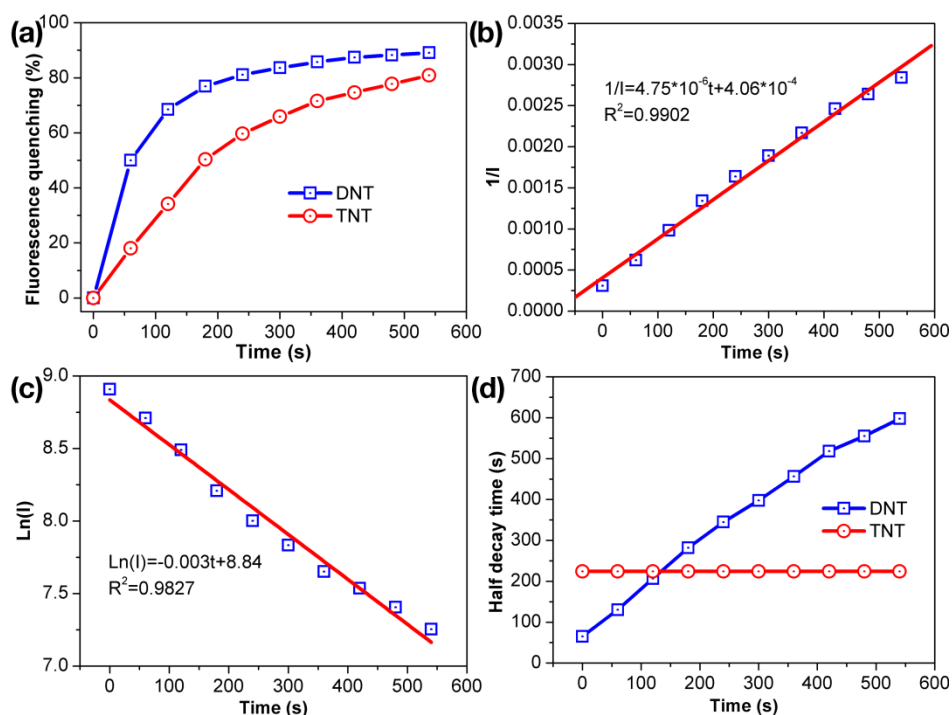

Fig. S1 a) Quenching efficiencies of the PVP/Pyrene/APTS/rGONanonets upon exposure to DNT and TNT subsaturated vapor at room temperature with respect to time. Fluorescence quenching kinetics of b) DNT ( $1/I \sim t$ ) and c) TNT ( $\text{Ln}(I) \sim t$ ). d) Half decay time upon exposure to DNT or TNT vapor.

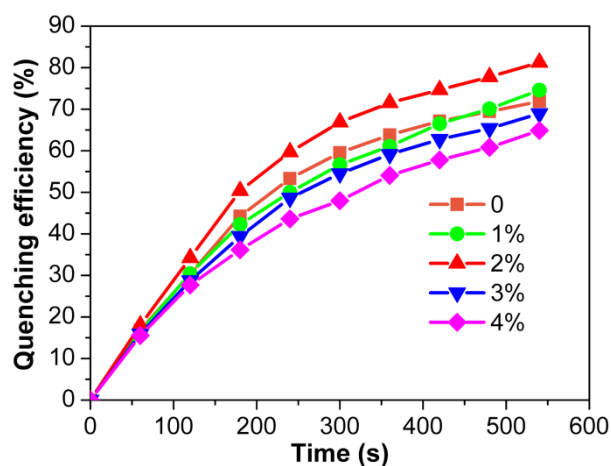

Fig. S2 Fluorescence quenching efficiencies of PVP/Pyrene/APTS/rGO nanonets containing different amounts of APTS upon exposure to subsaturated TNT vapor.

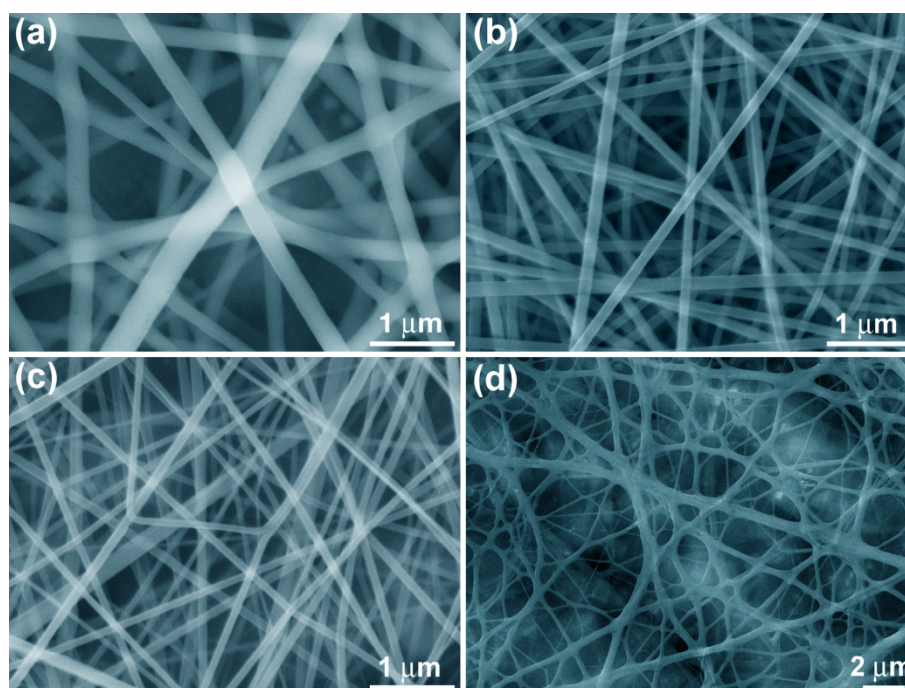

Fig. S3 SEM images of PVP/Pyrene/APTS/rGO nanofibrous film/nanonets with different amount of rGO (wt%). a) 0, b) 0.1, c) 0.2 and d) 0.4.

## Reference

1. R. G. Ewing, M. J. Waltman, D. A. Atkinson, J. W. Grate and P. J. Hotchkiss, *TrAC, Trends Anal. Chem.*, 2013, **42**, 35-48.
